# Supplementary material for: Two metal-free cyanurate crystals with a large optical birefringence resulting from the combination of π-conjugated units
Source: Royal Society of Chemistry journal article supplement (doi:10.1039/d1dt03500b), 2021-01-01
Supplement: d1dt03500b1.pdf [file d1dt03500b1.pdf]

## Supporting Information

### Two Metal-free Cyanurate Crystals with Large Optical Birefringence

#### Resulting from the Combination of $\pi$ -conjugated Units

Xiaomeng Liu,<sup>†,§</sup> Lei Kang,<sup>†</sup> Ruixin Guo<sup>†,§</sup> and Zheshuai Lin<sup>†,‡,§\*</sup>

<sup>†</sup> Technical Institute of Physics and Chemistry, Chinese Academy of Sciences, Beijing 100190, China

<sup>‡</sup> Center of Materials Science and Optoelectronics Engineering, University of Chinese Academy of Sciences, Beijing 100049, China

<sup>§</sup> University of Chinese Academy of Sciences, Beijing 100190, China

\*E-mail: zslin@mail.ipc.ac.cn (Z.L.)

### List of Contents

|                                                                                                                                                                                                                                                                                                            |    |
|------------------------------------------------------------------------------------------------------------------------------------------------------------------------------------------------------------------------------------------------------------------------------------------------------------|----|
| Synthesis of $\text{GUH}_2\text{C}_3\text{N}_3\text{O}_3$ and $\text{GU}_3(\text{H}_2\text{C}_3\text{N}_3\text{O}_3)_3(\text{H}_3\text{C}_3\text{N}_3\text{O}_3)$ .....                                                                                                                                    | 2  |
| Single-Crystal Structure Determination.....                                                                                                                                                                                                                                                                | 2  |
| Powder X-ray Diffraction .....                                                                                                                                                                                                                                                                             | 2  |
| Thermal Analysis .....                                                                                                                                                                                                                                                                                     | 2  |
| UV-vis-NIR Diffuse Reflectance Spectrum .....                                                                                                                                                                                                                                                              | 3  |
| Computational Methods.....                                                                                                                                                                                                                                                                                 | 3  |
| Figure S1. Experimental and calculated XRD patterns of $\text{GUH}_2\text{C}_3\text{N}_3\text{O}_3$ (a) and $\text{GU}_3(\text{H}_2\text{C}_3\text{N}_3\text{O}_3)_3(\text{H}_3\text{C}_3\text{N}_3\text{O}_3)$ (b).....                                                                                   | 4  |
| Figure S2. TG and DTA curves of $\text{GUH}_2\text{C}_3\text{N}_3\text{O}_3$ (a) and $\text{GU}_3(\text{H}_2\text{C}_3\text{N}_3\text{O}_3)_3(\text{H}_3\text{C}_3\text{N}_3\text{O}_3)$ (b). .                                                                                                            | 4  |
| Table S1. Crystal data and structure refinement for $\text{GUH}_2\text{C}_3\text{N}_3\text{O}_3$ and $\text{GU}_3(\text{H}_2\text{C}_3\text{N}_3\text{O}_3)_3(\text{H}_3\text{C}_3\text{N}_3\text{O}_3)$ . .....                                                                                           | 5  |
| Table S2. Fractional Atomic Coordinates ( $\times 10^4$ ) and Equivalent Isotropic Displacement Parameters ( $\text{\AA}^2 \times 10^3$ ) for $\text{GUH}_2\text{C}_3\text{N}_3\text{O}_3$ and $\text{GU}_3(\text{H}_2\text{C}_3\text{N}_3\text{O}_3)_3(\text{H}_3\text{C}_3\text{N}_3\text{O}_3)$ . ..... | 6  |
| Table S3. Anisotropic Displacement Parameters ( $\text{\AA}^2 \times 10^3$ ) for $\text{GUH}_2\text{C}_3\text{N}_3\text{O}_3$ and $\text{GU}_3(\text{H}_2\text{C}_3\text{N}_3\text{O}_3)_3(\text{H}_3\text{C}_3\text{N}_3\text{O}_3)$ . .....                                                              | 8  |
| Table S4. Selected bond length ( $\text{\AA}$ ) for $\text{GUH}_2\text{C}_3\text{N}_3\text{O}_3$ and $\text{GU}_3(\text{H}_2\text{C}_3\text{N}_3\text{O}_3)_3(\text{H}_3\text{C}_3\text{N}_3\text{O}_3)$ . ....                                                                                            | 10 |
| Table S5. Selected bond angles (deg.) for $\text{GUH}_2\text{C}_3\text{N}_3\text{O}_3$ and $\text{GU}_3(\text{H}_2\text{C}_3\text{N}_3\text{O}_3)_3(\text{H}_3\text{C}_3\text{N}_3\text{O}_3)$ . .....                                                                                                     | 11 |
| Table S6. The real-space atomic cutting analysis for the birefringence of $\text{GU}(\text{H}_2\text{C}_3\text{N}_3\text{O}_3)$ and $\text{GU}_3(\text{H}_2\text{C}_3\text{N}_3\text{O}_3)_3(\text{H}_3\text{C}_3\text{N}_3\text{O}_3)$ . .....                                                            | 12 |
| References.....                                                                                                                                                                                                                                                                                            | 13 |

## Synthesis of $\text{GUH}_2\text{C}_3\text{N}_3\text{O}_3$ and $\text{GU}_3(\text{H}_2\text{C}_3\text{N}_3\text{O}_3)_3(\text{H}_3\text{C}_3\text{N}_3\text{O}_3)$

Single crystals of  $\text{GUH}_2\text{C}_3\text{N}_3\text{O}_3$  and  $\text{GU}_3(\text{H}_2\text{C}_3\text{N}_3\text{O}_3)_3(\text{H}_3\text{C}_3\text{N}_3\text{O}_3)$  were synthesized by hydrothermal method at a temperature of 363 K. The experimental reagents used include  $(\text{CN}_3\text{H}_6)_2\text{CO}_3$ ,  $\text{H}_3\text{C}_3\text{N}_3\text{O}_3$  and  $\text{H}_3\text{BO}_3$ , all the reagents are analytical grade from commercial sources without further purification. For the synthesis of  $\text{GUH}_2\text{C}_3\text{N}_3\text{O}_3$ , the reaction mixture of  $(\text{CN}_3\text{H}_6)_2\text{CO}_3$  (0.18 g, 1 mmol),  $\text{H}_3\text{C}_3\text{N}_3\text{O}_3$  (0.13 g, 1 mmol),  $\text{H}_3\text{BO}_3$  (0.1g, 1.6 mmol) and 8 ml deionized water were sealed in an autoclave with a Teflon linear (25 ml). After heating at 363 K for 3 h, the mixture was cooled to room temperature at a rate of 3 °C/h. Similarly, for the synthesis of  $\text{GU}_3(\text{H}_2\text{C}_3\text{N}_3\text{O}_3)_3(\text{H}_3\text{C}_3\text{N}_3\text{O}_3)$ , the reaction mixture of  $(\text{CN}_3\text{H}_6)_2\text{CO}_3$  (0.14 g, 0.78 mmol),  $\text{H}_3\text{C}_3\text{N}_3\text{O}_3$  (0.19 g, 1.5 mmol) and 8 ml deionized water were sealed in an autoclave with a Teflon linear (25 ml). After heating at 363 K for 3 h, the mixture was cooled to room temperature at a rate of 3 °C/h. After that, the products were taken out and washed, and then colorless transparent  $\text{GUH}_2\text{C}_3\text{N}_3\text{O}_3$  and  $\text{GU}_3(\text{H}_2\text{C}_3\text{N}_3\text{O}_3)_3(\text{H}_3\text{C}_3\text{N}_3\text{O}_3)$  crystals were obtained.

$\text{GUH}_2\text{C}_3\text{N}_3\text{O}_3$  can also be obtained by the aqueous solution method. Weigh 1.35 g  $(\text{CN}_3\text{H}_6)_2\text{CO}_3$  (7.5 mmol) and 0.65 g  $\text{H}_3\text{C}_3\text{N}_3\text{O}_3$  (5 mmol) into a beaker, and add 10 ml deionized water, then stir with a magnet while heating. After a while, we can see that there are long flaky crystals in the solution. However, the quality of the crystals obtained by the aqueous solution method is not as good as the quality of the crystals obtained by the hydrothermal method.

## Single-Crystal Structure Determination

The diffraction data of  $\text{GUH}_2\text{C}_3\text{N}_3\text{O}_3$  and  $\text{GU}_3(\text{H}_2\text{C}_3\text{N}_3\text{O}_3)_3(\text{H}_3\text{C}_3\text{N}_3\text{O}_3)$  were collected on a Rigaku AFC10 single-crystal diffractometer equipped with graphite-monochromated Mo-K $\alpha$  radiation ( $\lambda = 0.71073 \text{ \AA}$ ) at 298(2) K. The crystal structures were solved by direct methods with the program SHELXS-97 and refined by full-matrix least squares on  $F^2$  by SHELXTL programs.<sup>1</sup> The structures were verified using the ADDSYM algorithm from the program PLATON,<sup>2</sup> and no higher symmetry was found. The relevant crystallographic data, the atomic coordinates and equivalent isotropic displacement parameters, the anisotropic displacement parameters and the selected bond distances and angles are listed in Table S1-S5.

## Powder X-ray Diffraction

Powder X-ray diffraction (XRD) of the polycrystalline materials were performed at room temperature using an automated Bruker D8 Focus X-ray diffractometer equipped with a diffracted monochromator set for Cu-K $\alpha$  ( $\lambda=1.5418 \text{ \AA}$ ) radiation. The scanning step width of  $0.02^\circ$  and the scanning rate of  $0.4^\circ\text{s}^{-1}$  were applied to record the patterns in the  $2\theta$  range of  $5\text{-}70^\circ$ .

## Thermal Analysis

Thermogravimetric analysis (TGA) was performed on an NETZSCH STA 409C/CD thermogravimetric analyzer. The sample was placed in an alumina crucible, which was heated at a rate of  $10^\circ\text{C}/\text{min}$  under  $\text{N}_2$  flow from room temperature to  $750^\circ\text{C}$ .

## UV-vis-NIR Diffuse Reflectance Spectrum

The UV-vis-NIR diffuse reflectance spectrums of  $\text{GUH}_2\text{C}_3\text{N}_3\text{O}_3$  and  $\text{GU}_3(\text{H}_2\text{C}_3\text{N}_3\text{O}_3)_3(\text{H}_3\text{C}_3\text{N}_3\text{O}_3)$  were collected with a Cary 7000 UV-vis-NIR spectrometer equipped in the wavelength range from 200 to 800 nm.

## Computational Methods

The first-principles calculations for  $\text{GUH}_2\text{C}_3\text{N}_3\text{O}_3$  and  $\text{GU}_3(\text{H}_2\text{C}_3\text{N}_3\text{O}_3)_3(\text{H}_3\text{C}_3\text{N}_3\text{O}_3)$  were performed by the plane-wave pseudopotential<sup>3</sup> method implemented in the CASTEP package<sup>4</sup> based on the density functional theory (DFT).<sup>5</sup> The Perdew-Burke-Ernzerhof (PBE) functionals of generalized gradient approximation (GGA) were adopted to describe the exchange-correlation (XC) functionals.<sup>6</sup> The plane-wave energy cutoff was set as 770 eV, self-consistent-field tolerance was set as  $5.0 \times 10^{-7}$  eV/atom and the  $k$ -point separation was set as  $0.04 \text{ \AA}^{-1}$  in the Brillouin zone.<sup>7</sup> The positions of H atoms in  $\text{GUH}_2\text{C}_3\text{N}_3\text{O}_3$  and  $\text{GU}_3(\text{H}_2\text{C}_3\text{N}_3\text{O}_3)_3(\text{H}_3\text{C}_3\text{N}_3\text{O}_3)$  were further optimized using the quasi-Newton method.<sup>8</sup> Based on optimized crystal structures, their electronic band structures were calculated. On the basis of the electronic structures, the linear optical properties were calculated by the scissors-corrected PBE method,<sup>9</sup> where the scissors operator is set as the difference between the experimental and first-principles band gaps in  $\text{GUH}_2\text{C}_3\text{N}_3\text{O}_3$  and  $\text{GU}_3(\text{H}_2\text{C}_3\text{N}_3\text{O}_3)_3(\text{H}_3\text{C}_3\text{N}_3\text{O}_3)$ . After the imaginary part of the dielectric function  $\epsilon_2$  was calculated, its real part was determined by the Kramers-Kronig transform, from which the refractive indices (and the birefringence  $\Delta n$ ) were obtained. Moreover, in order to analyze the contribution of an ion (or ionic group) to the birefringence, a real-space atom-cutting technique is adopted.<sup>10</sup>

**Figure S1.** Experimental and calculated XRD patterns of  $\text{GUH}_2\text{C}_3\text{N}_3\text{O}_3$  (a) and  $\text{GU}_3(\text{H}_2\text{C}_3\text{N}_3\text{O}_3)_3(\text{H}_3\text{C}_3\text{N}_3\text{O}_3)$  (b).

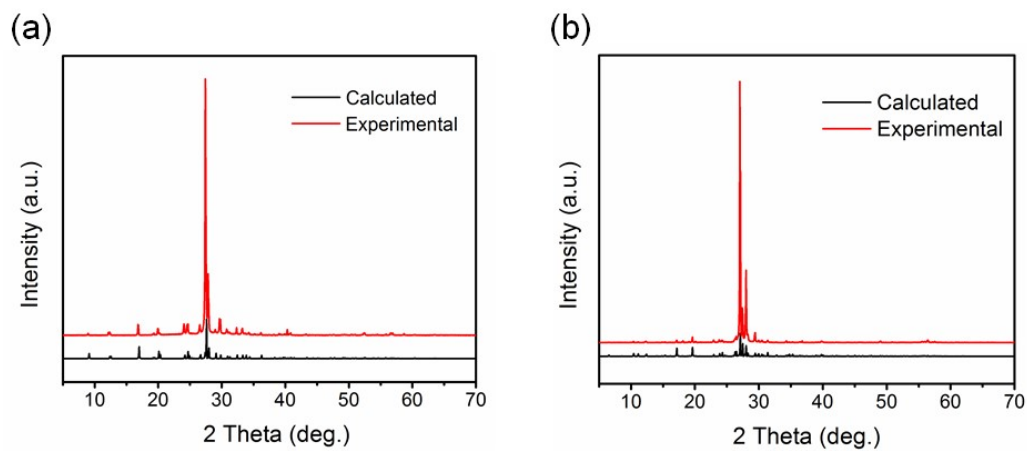

**Figure S2.** TG and DTA curves of  $\text{GUH}_2\text{C}_3\text{N}_3\text{O}_3$  (a) and  $\text{GU}_3(\text{H}_2\text{C}_3\text{N}_3\text{O}_3)_3(\text{H}_3\text{C}_3\text{N}_3\text{O}_3)$  (b).

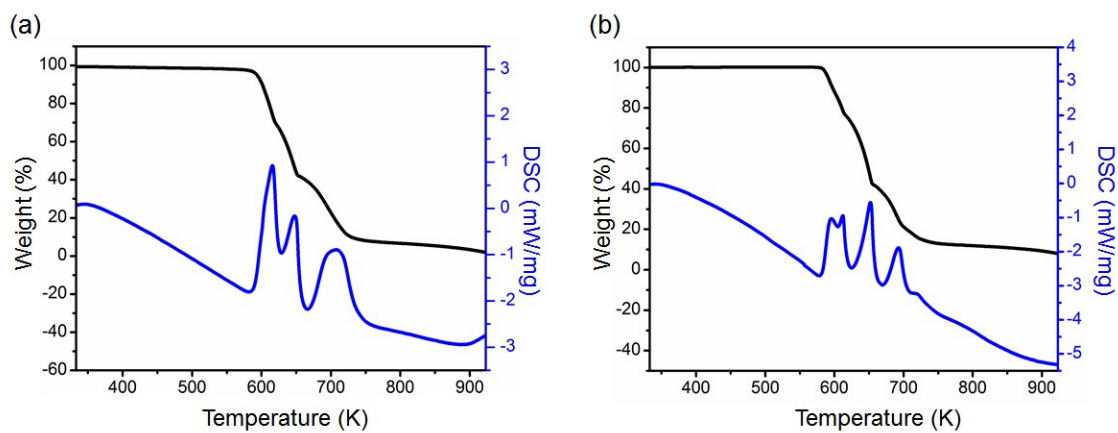

**Table S1.** Crystal data and structure refinement for  $\text{GUH}_2\text{C}_3\text{N}_3\text{O}_3$  and  $\text{GU}_3(\text{H}_2\text{C}_3\text{N}_3\text{O}_3)_3(\text{H}_3\text{C}_3\text{N}_3\text{O}_3)$ .

| Formula                                      | $\text{CN}_3\text{H}_6(\text{H}_2\text{C}_3\text{N}_3\text{O}_3)$ | $(\text{CN}_3\text{H}_6)_3(\text{H}_2\text{C}_3\text{N}_3\text{O}_3)_3(\text{H}_3\text{C}_3\text{N}_3\text{O}_3)$ |
|----------------------------------------------|-------------------------------------------------------------------|-------------------------------------------------------------------------------------------------------------------|
| Formula weight                               | 188.16                                                            | 693.57                                                                                                            |
| Temperature (K)                              | 293(2)                                                            | 293(2)                                                                                                            |
| Crystal system                               | triclinic                                                         | triclinic                                                                                                         |
| Space group                                  | <i>P</i> -1                                                       | <i>P</i> -1                                                                                                       |
| a (Å)                                        | 3.7706(2)                                                         | 9.9296(5)                                                                                                         |
| b (Å)                                        | 9.8381(6)                                                         | 10.4028(4)                                                                                                        |
| c (Å)                                        | 10.4914(5)                                                        | 13.9056(6)                                                                                                        |
| $\alpha$ (°)                                 | 87.925(4)                                                         | 84.674(3)                                                                                                         |
| $\beta$ (°)                                  | 83.172(4)                                                         | 76.702(4)                                                                                                         |
| $\gamma$ (°)                                 | 79.273(5)                                                         | 83.421(4)                                                                                                         |
| Volume (Å <sup>3</sup> )                     | 379.63(4)                                                         | 1385.38(11)                                                                                                       |
| Z                                            | 2                                                                 | 2                                                                                                                 |
| Calculated density (g/cm <sup>3</sup> )      | 1.646                                                             | 1.663                                                                                                             |
| Absorption coefficient (mm <sup>-1</sup> )   | 0.140                                                             | 0.143                                                                                                             |
| F(000)                                       | 196.0                                                             | 720.0                                                                                                             |
| Theta range for data collection (°)          | 2.85 to 29.71                                                     | 3.02 to 29.72                                                                                                     |
| Index ranges                                 | $-5 \leq h \leq 5, -13 \leq k \leq 12, -13 \leq l \leq 13$        | $-13 \leq h \leq 13, -14 \leq k \leq 13, -18 \leq l \leq 18$                                                      |
| Reflections collected                        | 5161                                                              | 23250                                                                                                             |
| Independent reflections                      | 1863 [ $R_{\text{int}} = 0.0232, R_{\text{sigma}} = 0.0360$ ]     | 7010 [ $R_{\text{int}} = 0.0266, R_{\text{sigma}} = 0.0265$ ]                                                     |
| Data/restraints/parameters                   | 1863/0/150                                                        | 7010/0/541                                                                                                        |
| Goodness-of-fit on F <sup>2</sup>            | 1.061                                                             | 1.059                                                                                                             |
| Final R indexes [ $I \geq 2\sigma(I)$ ]      | $R_1 = 0.0375, wR_2 = 0.1067$                                     | $R_1 = 0.0373, wR_2 = 0.1022$                                                                                     |
| Final R indexes [all data]                   | $R_1 = 0.0453, wR_2 = 0.1128$                                     | $R_1 = 0.0520, wR_2 = 0.1100$                                                                                     |
| Largest diff. peak/hole (e Å <sup>-3</sup> ) | 0.20/-0.22                                                        | 0.16/-0.28                                                                                                        |

[a]  $R_1 = \Sigma||F_o| - |F_c||/\Sigma|F_o|$  and  $wR_2 = [\Sigma w(F_o^2 - F_c^2)^2/\Sigma wF_o^4]^{1/2}$  for  $F_o^2 > 2\sigma(F_o^2)$ .

**Table S2.** Fractional Atomic Coordinates ( $\times 10^4$ ) and Equivalent Isotropic DisplacementParameters ( $\text{\AA}^2 \times 10^3$ ) for  $\text{GUH}_2\text{C}_3\text{N}_3\text{O}_3$  and  $\text{GU}_3(\text{H}_2\text{C}_3\text{N}_3\text{O}_3)_3(\text{H}_3\text{C}_3\text{N}_3\text{O}_3)$ .

| Compound                                     | Atom                                                                                                | <i>x</i>    | <i>y</i>    | <i>z</i>   | U(eq)      |
|----------------------------------------------|-----------------------------------------------------------------------------------------------------|-------------|-------------|------------|------------|
| $\text{GUH}_2\text{C}_3\text{N}_3\text{O}_3$ | O1                                                                                                  | 4219(3)     | 3307.2(10)  | 9166.8(8)  | 45.0(3)    |
|                                              | O2                                                                                                  | 11664(3)    | -818.2(9)   | 8476.4(8)  | 39.3(3)    |
|                                              | O3                                                                                                  | 7172(3)     | 1675.0(10)  | 5115.2(8)  | 43.7(3)    |
|                                              | N1                                                                                                  | 9369(3)     | 415.9(10)   | 6782.5(8)  | 28.7(2)    |
|                                              | N2                                                                                                  | 7920(3)     | 1256.5(10)  | 8817.3(9)  | 30.5(2)    |
|                                              | N3                                                                                                  | 5546(3)     | 2604.5(10)  | 7096.9(9)  | 32.6(3)    |
|                                              | N4                                                                                                  | -2820(3)    | 7270.3(11)  | 6932.1(11) | 36.0(3)    |
|                                              | N5                                                                                                  | 1376(3)     | 5334.6(13)  | 6293.6(11) | 38.5(3)    |
|                                              | N6                                                                                                  | -554(4)     | 5696.5(13)  | 8421.6(10) | 48.4(4)    |
|                                              | C1                                                                                                  | -682(3)     | 6103.0(11)  | 7227.0(10) | 28.4(2)    |
|                                              | C2                                                                                                  | 5807(3)     | 2445.9(11)  | 8364.6(10) | 29.7(3)    |
|                                              | C3                                                                                                  | 9771(3)     | 217.5(11)   | 8050.9(10) | 27.0(2)    |
|                                              | C4                                                                                                  | 7299(3)     | 1602.9(12)  | 6294.0(10) | 29.0(3)    |
|                                              | $\text{GU}_3(\text{H}_2\text{C}_3\text{N}_3\text{O}_3)_3(\text{H}_3\text{C}_3\text{N}_3\text{O}_3)$ | O1          | 3805.5(9)   | 3563.5(8)  | 15434.6(6) |
| O2                                           |                                                                                                     | 5362.1(11)  | 7.0(7)      | 13724.5(6) | 45.4(2)    |
| O3                                           |                                                                                                     | 5253.1(9)   | 3987.0(7)   | 12090.6(6) | 37.0(2)    |
| O4                                           |                                                                                                     | 6142.0(10)  | 1002.1(8)   | 10919.0(6) | 42.3(2)    |
| O5                                           |                                                                                                     | 6787.0(10)  | 5096.2(7)   | 9625.8(6)  | 42.6(2)    |
| O6                                           |                                                                                                     | 7580.7(11)  | 1787.7(8)   | 7595.5(6)  | 42.6(2)    |
| O7                                           |                                                                                                     | 8426.7(9)   | 5274.9(7)   | 7107.9(6)  | 35.5(2)    |
| O8                                           |                                                                                                     | 7157.3(10)  | 8689.5(7)   | 9025.7(6)  | 38.9(2)    |
| O9                                           |                                                                                                     | 8596.6(10)  | 9391.9(8)   | 5706.8(6)  | 42.1(2)    |
| O10                                          |                                                                                                     | 8517.1(10)  | 10881.7(8)  | 2619.5(6)  | 45.8(2)    |
| O11                                          |                                                                                                     | 10414.9(11) | 11526.4(8)  | -653.3(6)  | 46.5(2)    |
| O12                                          |                                                                                                     | 9332.0(11)  | 14934.7(8)  | 1282.6(6)  | 47.6(2)    |
| N1                                           |                                                                                                     | 6401.0(14)  | 8555.5(10)  | 12040.2(9) | 45.8(3)    |
| N2                                           |                                                                                                     | 5817.2(13)  | 6501.1(10)  | 12593.1(8) | 41.1(3)    |
| N3                                           |                                                                                                     | 6344.9(13)  | 7080.0(11)  | 10928.1(8) | 43.1(3)    |
| N4                                           |                                                                                                     | 8796.4(14)  | 8498.9(10)  | 3783.2(9)  | 44.6(3)    |
| N5                                           |                                                                                                     | 9540.3(12)  | 6416.4(10)  | 4242.4(8)  | 38.4(2)    |
| N6                                           |                                                                                                     | 9378.2(12)  | 6967.9(11)  | 2630.3(8)  | 39.6(2)    |
| N7                                           |                                                                                                     | 7139.1(12)  | 13409.9(11) | 5710.7(8)  | 41.7(3)    |
| N8                                           |                                                                                                     | 8141.1(12)  | 11843.3(10) | 4631.6(9)  | 41.5(3)    |
| N9                                           | 7611.5(12)                                                                                          | 13918.1(10) | 4036.1(8)   | 39.1(2)    |            |
| N10                                          | 4449.7(10)                                                                                          | 3888.3(8)   | 13760.5(7)  | 29.3(2)    |            |

| Compound                                                                                                                                                   | Atom | <i>x</i>   | <i>y</i>    | <i>z</i>   | U(eq)   |
|------------------------------------------------------------------------------------------------------------------------------------------------------------|------|------------|-------------|------------|---------|
| GU <sub>3</sub> (H <sub>2</sub> C <sub>3</sub> N <sub>3</sub> O <sub>3</sub> ) <sub>3</sub> (H <sub>3</sub> C <sub>3</sub> N <sub>3</sub> O <sub>3</sub> ) | N11  | 4595.1(11) | 1797.9(9)   | 14584.1(7) | 32.6(2) |
|                                                                                                                                                            | N12  | 5245.3(11) | 1997.6(9)   | 12900.9(7) | 32.6(2) |
|                                                                                                                                                            | N13  | 6396.2(11) | 3066.9(8)   | 10286.1(7) | 32.0(2) |
|                                                                                                                                                            | N14  | 6882.8(11) | 1368.6(9)   | 9257.1(7)  | 33.5(2) |
|                                                                                                                                                            | N15  | 7226.7(11) | 3464.9(9)   | 8591.7(7)  | 32.8(2) |
|                                                                                                                                                            | N16  | 7729.7(10) | 6981.8(8)   | 8052.2(7)  | 28.8(2) |
|                                                                                                                                                            | N17  | 7923.1(11) | 9035.9(9)   | 7358.2(7)  | 31.4(2) |
|                                                                                                                                                            | N18  | 8582.3(10) | 7288.2(8)   | 6320.5(7)  | 30.7(2) |
|                                                                                                                                                            | N19  | 8866.1(11) | 12950.0(9)  | 2028.7(7)  | 34.0(2) |
|                                                                                                                                                            | N20  | 9456.3(11) | 11201.8(9)  | 988.9(7)   | 33.6(2) |
|                                                                                                                                                            | N21  | 9874.7(11) | 13244.9(9)  | 313.1(7)   | 32.7(2) |
|                                                                                                                                                            | C1   | 6193.7(12) | 7375.0(10)  | 11863.7(8) | 30.5(2) |
|                                                                                                                                                            | C2   | 9240.2(12) | 7298.1(10)  | 3552.9(8)  | 30.2(2) |
|                                                                                                                                                            | C3   | 7633.2(11) | 13057.6(10) | 4793.8(8)  | 29.8(2) |
|                                                                                                                                                            | C4   | 4261.2(11) | 3133.6(10)  | 14614.4(8) | 28.0(2) |
|                                                                                                                                                            | C5   | 4978.6(11) | 3342.9(10)  | 12908.7(8) | 28.1(2) |
|                                                                                                                                                            | C6   | 5088.6(12) | 1187.7(10)  | 13736.4(8) | 30.5(2) |
|                                                                                                                                                            | C7   | 6802.5(12) | 3946.1(10)  | 9508.5(8)  | 29.5(2) |
|                                                                                                                                                            | C8   | 6447.7(12) | 1762.1(10)  | 10202.7(8) | 29.5(2) |
|                                                                                                                                                            | C9   | 7250.3(12) | 2183.0(10)  | 8426.1(8)  | 30.7(2) |
|                                                                                                                                                            | C10  | 7576.7(11) | 8264.6(10)  | 8196.4(8)  | 26.9(2) |
|                                                                                                                                                            | C11  | 8386.9(12) | 8575.2(10)  | 6415.0(8)  | 28.6(2) |
|                                                                                                                                                            | C12  | 8271.4(11) | 6474.5(9)   | 7128.7(7)  | 26.4(2) |
|                                                                                                                                                            | C13  | 9339.5(12) | 13750.6(10) | 1236.1(8)  | 31.1(2) |
|                                                                                                                                                            | C14  | 8924.5(12) | 11671.5(10) | 1923.0(8)  | 30.3(2) |
|                                                                                                                                                            | C15  | 9950.0(12) | 11964.4(10) | 165.4(8)   | 30.7(2) |

[a] U<sub>eq</sub> is defined as one-third of the trace of the orthogonalized U<sub>ij</sub> tensor.

**Table S3.** Anisotropic Displacement Parameters ( $\text{\AA}^2 \times 10^3$ ) for  $\text{GUH}_2\text{C}_3\text{N}_3\text{O}_3$  and  $\text{GU}_3(\text{H}_2\text{C}_3\text{N}_3\text{O}_3)_3(\text{H}_3\text{C}_3\text{N}_3\text{O}_3)$ .

| Compound                                     | Atom                                                                                                | $U_{11}$ | $U_{22}$ | $U_{33}$ | $U_{23}$ | $U_{13}$ | $U_{12}$ |
|----------------------------------------------|-----------------------------------------------------------------------------------------------------|----------|----------|----------|----------|----------|----------|
| $\text{GUH}_2\text{C}_3\text{N}_3\text{O}_3$ | O1                                                                                                  | 61.0(6)  | 36.0(5)  | 27.0(4)  | -5.4(3)  | -2.4(4)  | 18.9(4)  |
|                                              | O2                                                                                                  | 55.1(6)  | 31.5(5)  | 22.9(4)  | -1.0(3)  | -9.4(4)  | 16.8(4)  |
|                                              | O3                                                                                                  | 54.9(6)  | 48.1(5)  | 18.2(4)  | 2.2(4)   | -5.8(4)  | 16.6(4)  |
|                                              | N1                                                                                                  | 38.0(5)  | 26.3(5)  | 17.1(4)  | -1.1(3)  | -3.4(3)  | 6.6(4)   |
|                                              | N2                                                                                                  | 41.6(6)  | 27.5(5)  | 17.7(4)  | -0.8(3)  | -5.1(4)  | 7.2(4)   |
|                                              | N3                                                                                                  | 38.5(5)  | 30.0(5)  | 23.0(5)  | 1.9(4)   | -3.6(4)  | 9.4(4)   |
|                                              | N4                                                                                                  | 43.0(6)  | 31.5(5)  | 28.5(5)  | 1.9(4)   | -6.2(4)  | 7.0(4)   |
|                                              | N5                                                                                                  | 47.1(6)  | 37.9(6)  | 24.3(5)  | -2.3(4)  | -1.5(4)  | 7.0(5)   |
|                                              | N6                                                                                                  | 67.1(8)  | 41.2(6)  | 22.7(5)  | 2.8(4)   | 0.0(5)   | 22.8(6)  |
|                                              | C1                                                                                                  | 32.4(5)  | 27.1(5)  | 24.2(5)  | -0.3(4)  | -4.4(4)  | -0.6(4)  |
|                                              | C2                                                                                                  | 34.6(6)  | 26.2(5)  | 23.7(5)  | -0.6(4)  | -2.5(4)  | 5.7(4)   |
|                                              | C3                                                                                                  | 32.9(5)  | 25.5(5)  | 19.7(5)  | 0.1(4)   | -5.1(4)  | 3.1(4)   |
|                                              | C4                                                                                                  | 32.3(5)  | 30.6(5)  | 20.3(5)  | 3.6(4)   | -3.6(4)  | 4.1(4)   |
|                                              | $\text{GU}_3(\text{H}_2\text{C}_3\text{N}_3\text{O}_3)_3(\text{H}_3\text{C}_3\text{N}_3\text{O}_3)$ | O1       | 57.8(5)  | 29.4(4)  | 25.2(4)  | -7.6(3)  | -2.6(4)  |
| O2                                           |                                                                                                     | 82.3(7)  | 19.9(4)  | 25.5(4)  | -0.9(3)  | 0.4(4)   | 4.6(4)   |
| O3                                           |                                                                                                     | 60.4(5)  | 22.9(4)  | 23.3(4)  | 1.5(3)   | -1.5(4)  | -3.6(3)  |
| O4                                           |                                                                                                     | 74.4(6)  | 22.1(4)  | 24.3(4)  | 3.2(3)   | -0.1(4)  | -4.8(4)  |
| O5                                           |                                                                                                     | 80.6(6)  | 18.5(4)  | 24.4(4)  | -3.2(3)  | 0.3(4)   | -9.4(4)  |
| O6                                           |                                                                                                     | 80.6(6)  | 21.9(4)  | 21.2(4)  | -4.1(3)  | -1.5(4)  | -5.4(4)  |
| O7                                           |                                                                                                     | 57.2(5)  | 17.5(4)  | 26.3(4)  | -1.8(3)  | -0.4(3)  | 1.3(3)   |
| O8                                           |                                                                                                     | 69.3(6)  | 21.8(4)  | 21.0(4)  | -3.8(3)  | -0.1(4)  | -3.3(4)  |
| O9                                           |                                                                                                     | 74.3(6)  | 22.4(4)  | 23.6(4)  | 3.3(3)   | -1.1(4)  | -4.0(4)  |
| O10                                          |                                                                                                     | 72.7(6)  | 27.5(4)  | 28.2(4)  | 6.4(3)   | 4.1(4)   | -5.8(4)  |
| O11                                          |                                                                                                     | 85.1(7)  | 25.1(4)  | 23.8(4)  | -5.6(3)  | 3.6(4)   | -10.3(4) |
| O12                                          |                                                                                                     | 91.6(7)  | 20.2(4)  | 26.9(4)  | -3.0(3)  | -2.7(4)  | -8.9(4)  |
| N1                                           |                                                                                                     | 82.9(8)  | 21.5(5)  | 28.1(5)  | -4.7(4)  | 0.1(5)   | -7.9(5)  |
| N2                                           |                                                                                                     | 69.2(7)  | 27.0(5)  | 25.1(5)  | 1.9(4)   | -4.7(5)  | -10.8(5) |
| N3                                           |                                                                                                     | 77.1(8)  | 26.6(5)  | 22.4(5)  | -3.9(4)  | -3.1(5)  | -6.4(5)  |
| N4                                           |                                                                                                     | 79.9(8)  | 23.0(5)  | 28.2(5)  | -3.7(4)  | -10.1(5) | 4.3(5)   |
| N5                                           |                                                                                                     | 56.2(6)  | 27.7(5)  | 27.7(5)  | -2.9(4)  | -6.9(4)  | 7.2(4)   |
| N6                                           |                                                                                                     | 63.7(7)  | 27.5(5)  | 27.6(5)  | -5.6(4)  | -12.0(5) | 2.8(5)   |
| N7                                           |                                                                                                     | 60.0(7)  | 32.8(6)  | 28.2(5)  | -2.1(4)  | -6.1(5)  | 5.4(5)   |
| N8                                           |                                                                                                     | 59.3(7)  | 23.4(5)  | 35.2(6)  | 0.4(4)   | -1.9(5)  | 4.1(4)   |
| N9                                           | 56.7(6)                                                                                             | 24.9(5)  | 30.6(5)  | -1.8(4)  | -4.5(5)  | 6.8(4)   |          |
| N10                                          | 40.9(5)                                                                                             | 19.9(4)  | 25.6(5)  | -2.6(3)  | -5.5(4)  | 0.9(3)   |          |



| Compound                                                                                                                                                   | Atom    | U <sub>11</sub> | U <sub>22</sub> | U <sub>33</sub> | U <sub>23</sub> | U <sub>13</sub> | U <sub>12</sub> |
|------------------------------------------------------------------------------------------------------------------------------------------------------------|---------|-----------------|-----------------|-----------------|-----------------|-----------------|-----------------|
| GU <sub>3</sub> (H <sub>2</sub> C <sub>3</sub> N <sub>3</sub> O <sub>3</sub> ) <sub>3</sub> (H <sub>3</sub> C <sub>3</sub> N <sub>3</sub> O <sub>3</sub> ) | N11     | 51.4(6)         | 21.3(4)         | 20.3(4)         | -0.2(3)         | -1.3(4)         | 2.8(4)          |
|                                                                                                                                                            | N12     | 52.6(6)         | 20.1(4)         | 20.2(4)         | -1.9(3)         | 0.3(4)          | 0.6(4)          |
|                                                                                                                                                            | N13     | 55.0(6)         | 18.4(4)         | 19.3(4)         | -1.2(3)         | -1.4(4)         | -3.3(4)         |
|                                                                                                                                                            | N14     | 59.2(6)         | 15.3(4)         | 22.5(5)         | -1.9(3)         | -1.9(4)         | -3.5(4)         |
|                                                                                                                                                            | N15     | 57.5(6)         | 18.2(4)         | 18.5(4)         | -0.7(3)         | 0.8(4)          | -5.4(4)         |
|                                                                                                                                                            | N16     | 47.0(5)         | 16.1(4)         | 19.6(4)         | 0.6(3)          | -0.6(4)         | -2.9(4)         |
|                                                                                                                                                            | N17     | 55.1(6)         | 14.0(4)         | 22.4(4)         | -0.7(3)         | -3.2(4)         | -3.7(4)         |
|                                                                                                                                                            | N18     | 47.5(5)         | 19.8(4)         | 21.3(4)         | -1.8(3)         | -1.3(4)         | -1.6(4)         |
|                                                                                                                                                            | N19     | 54.1(6)         | 23.4(5)         | 20.9(4)         | -1.2(3)         | -1.6(4)         | -2.3(4)         |
|                                                                                                                                                            | N20     | 54.1(6)         | 18.2(4)         | 24.8(5)         | -1.0(3)         | -0.4(4)         | -5.8(4)         |
|                                                                                                                                                            | N21     | 56.2(6)         | 19.0(4)         | 20.1(4)         | -0.5(3)         | -1.2(4)         | -6.9(4)         |
|                                                                                                                                                            | C1      | 44.5(6)         | 21.6(5)         | 22.2(5)         | -2.3(4)         | -2.6(4)         | 0.6(4)          |
|                                                                                                                                                            | C2      | 38.6(6)         | 24.0(5)         | 25.9(5)         | -3.4(4)         | -2.9(4)         | -2.0(4)         |
|                                                                                                                                                            | C3      | 32.5(5)         | 25.8(5)         | 30.0(5)         | -3.0(4)         | -5.1(4)         | -1.5(4)         |
|                                                                                                                                                            | C4      | 34.2(5)         | 23.0(5)         | 25.0(5)         | -3.9(4)         | -4.4(4)         | 1.7(4)          |
| C5                                                                                                                                                         | 36.7(5) | 20.8(5)         | 25.5(5)         | 0.2(4)          | -5.0(4)         | -2.7(4)         |                 |
| C6                                                                                                                                                         | 43.1(6) | 21.5(5)         | 23.1(5)         | -1.5(4)         | -1.6(4)         | 1.1(4)          |                 |
| C7                                                                                                                                                         | 47.3(6) | 18.5(5)         | 20.4(5)         | -1.3(4)         | -2.9(4)         | -2.9(4)         |                 |
| C8                                                                                                                                                         | 44.4(6) | 20.4(5)         | 20.7(5)         | -0.1(4)         | -2.6(4)         | -2.0(4)         |                 |
| C9                                                                                                                                                         | 49.2(6) | 19.6(5)         | 20.8(5)         | -1.7(4)         | -2.7(4)         | -2.8(4)         |                 |
| C10                                                                                                                                                        | 38.9(5) | 19.2(5)         | 21.2(5)         | -1.9(4)         | -3.4(4)         | -2.7(4)         |                 |
| C11                                                                                                                                                        | 40.7(6) | 21.6(5)         | 21.5(5)         | 0.1(4)          | -3.7(4)         | -3.2(4)         |                 |
| C12                                                                                                                                                        | 36.8(5) | 18.7(5)         | 21.5(5)         | -2.3(4)         | -3.1(4)         | 0.3(4)          |                 |
| C13                                                                                                                                                        | 50.3(6) | 21.0(5)         | 20.7(5)         | -2.0(4)         | -4.8(4)         | -3.8(4)         |                 |
| C14                                                                                                                                                        | 41.6(6) | 23.7(5)         | 22.6(5)         | 1.6(4)          | -2.8(4)         | -2.1(4)         |                 |
| C15                                                                                                                                                        | 47.1(6) | 20.9(5)         | 22.3(5)         | -2.0(4)         | -3.2(4)         | -5.0(4)         |                 |

[a] The anisotropic displacement factor exponent takes the form:  $-2\pi^2[h^2a^{*2}U_{11}+2hka^*b^*U_{12}+\dots]$ .

**Table S4.** Selected bond length (Å) for GUH<sub>2</sub>C<sub>3</sub>N<sub>3</sub>O<sub>3</sub> and GU<sub>3</sub>(H<sub>2</sub>C<sub>3</sub>N<sub>3</sub>O<sub>3</sub>)<sub>3</sub>(H<sub>3</sub>C<sub>3</sub>N<sub>3</sub>O<sub>3</sub>).

| Compound                                                                                                                                                   | Bond    | Length/Å   | Bond    | Length/Å   |
|------------------------------------------------------------------------------------------------------------------------------------------------------------|---------|------------|---------|------------|
| GUH <sub>2</sub> C <sub>3</sub> N <sub>3</sub> O <sub>3</sub>                                                                                              | O2-C3   | 1.2325(13) | N2-C2   | 1.3901(13) |
|                                                                                                                                                            | O1-C2   | 1.2360(14) | N4-C1   | 1.3242(15) |
|                                                                                                                                                            | O3-C4   | 1.2423(14) | N3-C4   | 1.3427(15) |
|                                                                                                                                                            | N1-C3   | 1.3602(13) | N3-C2   | 1.3465(14) |
|                                                                                                                                                            | N1-C4   | 1.3958(13) | N5-C1   | 1.3368(15) |
|                                                                                                                                                            | N2-C3   | 1.3560(13) | N6-C1   | 1.3053(15) |
| GU <sub>3</sub> (H <sub>2</sub> C <sub>3</sub> N <sub>3</sub> O <sub>3</sub> ) <sub>3</sub> (H <sub>3</sub> C <sub>3</sub> N <sub>3</sub> O <sub>3</sub> ) | O7-C12  | 1.2420(12) | N12-C6  | 1.3598(13) |
|                                                                                                                                                            | O8-C10  | 1.2369(13) | N14-C8  | 1.3716(13) |
|                                                                                                                                                            | O3-C5   | 1.2550(13) | N14-C9  | 1.3717(13) |
|                                                                                                                                                            | O5-C7   | 1.2203(13) | N15-C7  | 1.3698(13) |
|                                                                                                                                                            | O1-C4   | 1.2315(13) | N15-C9  | 1.3709(13) |
|                                                                                                                                                            | O9-C11  | 1.2353(13) | N21-C15 | 1.3576(14) |
|                                                                                                                                                            | O6-C9   | 1.2221(13) | N21-C13 | 1.3978(14) |
|                                                                                                                                                            | O4-C8   | 1.2161(13) | N19-C14 | 1.3448(14) |
|                                                                                                                                                            | O10-C14 | 1.2349(13) | N19-C13 | 1.3454(14) |
|                                                                                                                                                            | O2-C6   | 1.2280(13) | N11-C4  | 1.3933(13) |
|                                                                                                                                                            | O12-C13 | 1.2385(13) | N11-C6  | 1.3544(13) |
|                                                                                                                                                            | O11-C15 | 1.2342(13) | N20-C15 | 1.3576(14) |
|                                                                                                                                                            | N16-C10 | 1.3540(13) | N20-C14 | 1.3957(14) |
|                                                                                                                                                            | N16-C12 | 1.4000(13) | N5-C2   | 1.3247(15) |
|                                                                                                                                                            | N10-C5  | 1.3309(13) | N9-C3   | 1.3202(15) |
|                                                                                                                                                            | N10-C4  | 1.3489(14) | N6-C2   | 1.3315(14) |
|                                                                                                                                                            | N18-C11 | 1.3450(13) | N2-C1   | 1.3142(14) |
|                                                                                                                                                            | N18-C12 | 1.3411(13) | N8-C3   | 1.3250(14) |
|                                                                                                                                                            | N13-C8  | 1.3671(13) | N3-C1   | 1.3354(14) |
|                                                                                                                                                            | N13-C7  | 1.3670(13) | N7-C3   | 1.3260(15) |
|                                                                                                                                                            | N17-C10 | 1.3511(13) | N1-C1   | 1.3220(15) |
|                                                                                                                                                            | N17-C11 | 1.3965(14) | N4-C2   | 1.3192(14) |
|                                                                                                                                                            | N12-C5  | 1.3948(13) |         |            |

**Table S5.** Selected bond angles (deg.) for  $\text{GUH}_2\text{C}_3\text{N}_3\text{O}_3$  and  $\text{GU}_3(\text{H}_2\text{C}_3\text{N}_3\text{O}_3)_3(\text{H}_3\text{C}_3\text{N}_3\text{O}_3)$ .

| Compound                                                                                            | Bond        | Angle/°    | Bond        | Angle/°    |
|-----------------------------------------------------------------------------------------------------|-------------|------------|-------------|------------|
| $\text{GUH}_2\text{C}_3\text{N}_3\text{O}_3$                                                        | C3-N1-C4    | 123.20(9)  | N6-C1-N5    | 119.61(11) |
|                                                                                                     | C3-N2-C2    | 123.72(9)  | O3-C4-N1    | 117.38(10) |
|                                                                                                     | C4-N3-C2    | 119.38(9)  | O3-C4-N3    | 122.96(10) |
|                                                                                                     | O2-C3-N1    | 123.08(10) | N3-C4-N1    | 119.66(9)  |
|                                                                                                     | O2-C3-N2    | 122.36(10) | O1-C2-N2    | 117.29(10) |
|                                                                                                     | N2-C3-N1    | 114.56(9)  | O1-C2-N3    | 123.25(10) |
|                                                                                                     | N4-C1-N5    | 119.75(11) | N3-C2-N2    | 119.46(9)  |
|                                                                                                     | N6-C1-N4    | 120.64(11) |             |            |
| $\text{GU}_3(\text{H}_2\text{C}_3\text{N}_3\text{O}_3)_3(\text{H}_3\text{C}_3\text{N}_3\text{O}_3)$ | C10-N16-C12 | 123.68(9)  | N21-C15-N20 | 114.67(9)  |
|                                                                                                     | C5-N10-C4   | 119.21(9)  | N9-C3-N8    | 119.66(11) |
|                                                                                                     | C12-N18-C11 | 119.36(9)  | N9-C3-N7    | 119.92(10) |
|                                                                                                     | C7-N13-C8   | 124.18(9)  | N8-C3-N7    | 120.42(11) |
|                                                                                                     | C10-N17-C11 | 123.92(9)  | O7-C12-N16  | 117.15(9)  |
|                                                                                                     | C6-N12-C5   | 123.46(9)  | O7-C12-N18  | 123.50(9)  |
|                                                                                                     | C8-N14-C9   | 124.68(9)  | N18-C12-N16 | 119.34(9)  |
|                                                                                                     | C7-N15-C9   | 123.80(9)  | O4-C8-N13   | 122.26(10) |
|                                                                                                     | C15-N21-C13 | 123.23(9)  | O4-C8-N14   | 122.35(10) |
|                                                                                                     | C14-N19-C13 | 119.48(9)  | N13-C8-N14  | 115.38(9)  |
|                                                                                                     | C6-N11-C4   | 123.87(9)  | O5-C7-N13   | 121.76(10) |
|                                                                                                     | C15-N20-C14 | 123.65(9)  | O5-C7-N15   | 121.91(10) |
|                                                                                                     | O3-C5-N10   | 122.92(9)  | N13-C7-N15  | 116.33(9)  |
|                                                                                                     | O3-C5-N12   | 117.17(10) | N2-C1-N3    | 119.77(11) |
|                                                                                                     | N10-C5-N12  | 119.90(9)  | N2-C1-N1    | 121.08(11) |
|                                                                                                     | O8-C10-N16  | 122.68(10) | N1-C1-N3    | 119.14(11) |
|                                                                                                     | O8-C10-N17  | 123.10(9)  | O6-C9-N14   | 122.06(9)  |
|                                                                                                     | N17-C10-N16 | 114.22(9)  | O6-C9-N15   | 122.45(10) |
|                                                                                                     | N5-C2-N6    | 119.90(10) | N15-C9-N14  | 115.49(9)  |
|                                                                                                     | N4-C2-N5    | 119.95(11) | O2-C6-N12   | 123.06(10) |
|                                                                                                     | N4-C2-N6    | 120.15(11) | O2-C6-N11   | 122.90(10) |
|                                                                                                     | O9-C11-N18  | 123.58(10) | N11-C6-N12  | 114.04(9)  |
|                                                                                                     | O9-C11-N17  | 117.15(9)  | O10-C14-N19 | 122.87(10) |
|                                                                                                     | N18-C11-N17 | 119.27(9)  | O10-C14-N20 | 117.79(10) |
|                                                                                                     | O1-C4-N10   | 123.32(9)  | N19-C14-N20 | 119.34(10) |
|                                                                                                     | O1-C4-N11   | 117.34(10) | O12-C13-N21 | 117.50(10) |
|                                                                                                     | N10-C4-N11  | 119.35(9)  | O12-C13-N19 | 122.87(10) |
|                                                                                                     | O11-C15-N21 | 122.86(10) | N19-C13-N21 | 119.63(9)  |
|                                                                                                     | O11-C15-N20 | 122.46(10) |             |            |

**Table S6.** The real-space atomic cutting analysis for the birefringence of  $\text{GU}(\text{H}_2\text{C}_3\text{N}_3\text{O}_3)$  and  $\text{GU}_3(\text{H}_2\text{C}_3\text{N}_3\text{O}_3)_3(\text{H}_3\text{C}_3\text{N}_3\text{O}_3)$ .

|                                                                       | $\Delta n$ at 400 nm<br>[ $\text{GU}(\text{H}_2\text{C}_3\text{N}_3\text{O}_3)$ ] | $(\Delta n$ at 400 nm)<br>[ $\text{GU}_3(\text{H}_2\text{C}_3\text{N}_3\text{O}_3)_3(\text{H}_3\text{C}_3\text{N}_3\text{O}_3)$ ] |
|-----------------------------------------------------------------------|-----------------------------------------------------------------------------------|-----------------------------------------------------------------------------------------------------------------------------------|
| Total                                                                 | 0.419                                                                             | 0.402                                                                                                                             |
| GU cations                                                            | 0.178 (32%)                                                                       | 0.148 (29.5%)                                                                                                                     |
| $(\text{H}_x\text{C}_3\text{N}_3\text{O}_3)^{x-3}$ ( $x = 0 \sim 3$ ) | 0.379 (68%)                                                                       | 0.354 (70.5%)                                                                                                                     |

## References

- (1) G. M. Sheldrick, *Acta Crystallogr A* **2008**, 64, 112-122.
- (2) A. L. Spek, *J. Appl. Crystallogr.* **2003**, 36, 7-13.
- (3) M. C. Payne, M. P. Teter, D. C. Allan, T. A. Arias, J. D. Joannopoulos, *Rev. Mod. Phys.* **1992**, 64, 1045-1097.
- (4) S. J. Clark, M. D. SegallIII, C. J. PickardII, P. J. HasnipIII, M. I. J. ProbertIV, and, K. R.; PayneI, M. C. *Z. Anorg. Allg. Chem.* **2005**, 220, 567-570.
- (5) W. Kohn, *Rev. Mod. Phys.* **1999**, 71, 1253-1266.
- (6) M. G. Medvedev, I. S. Bushmarinov, J. Sun, J. P. Perdew, K. A. Lyssenko, *Science* **2017**, 355, 49-52.
- (7) H. J. Monkhorst, J. D. Pack, *Phys. Rev. B* **1976**, 13, 5188-5192.
- (8) B. G. Pfrommer, M. C. te, S. G. Louie, M. L. Cohen, *J. Comput. Phys.* **1997**, 131, 233-240.
- (9) D. M. Ceperley, B. J. Alder, *Phys. Rev. Lett.* **1980**, 45, 566-569.
- (10) J. Lin, M. H. Lee, Z. P. Liu, C. T. Chen, C. J. Pickard, *Phys. Rev. B* **1999**, 60, 13380-13389.
